# Supplementary material
Source: PubMed Central journal article supplement (PMC6511273)

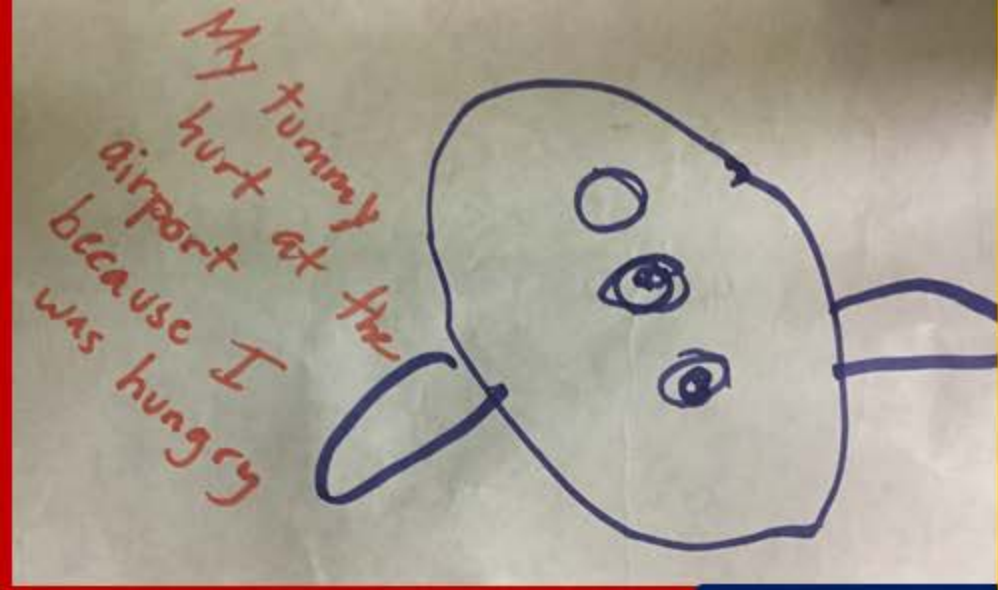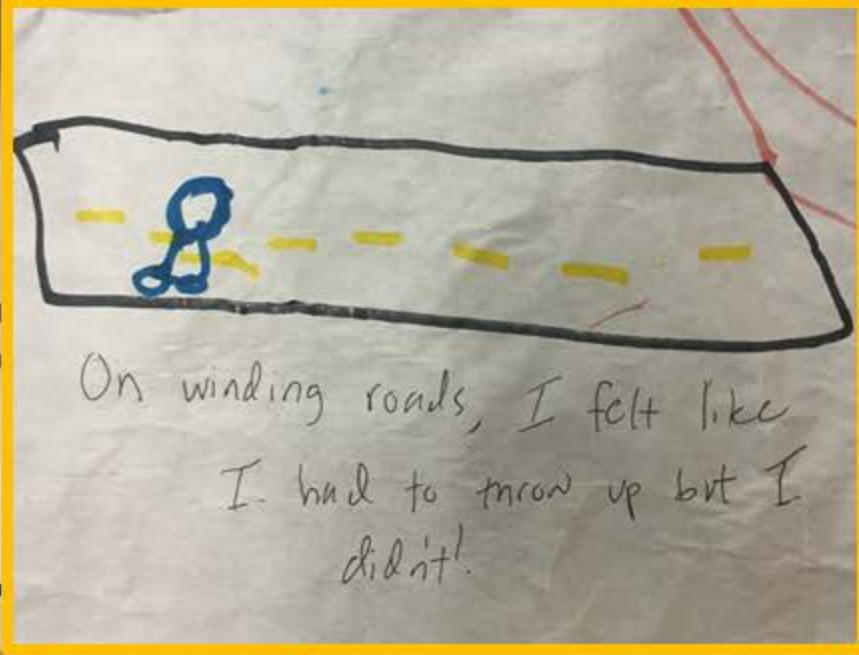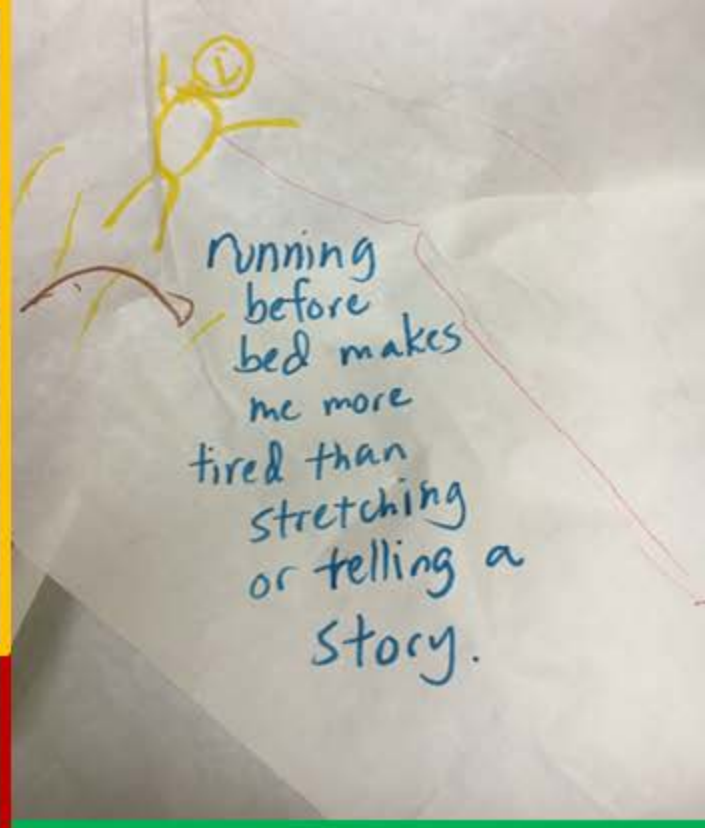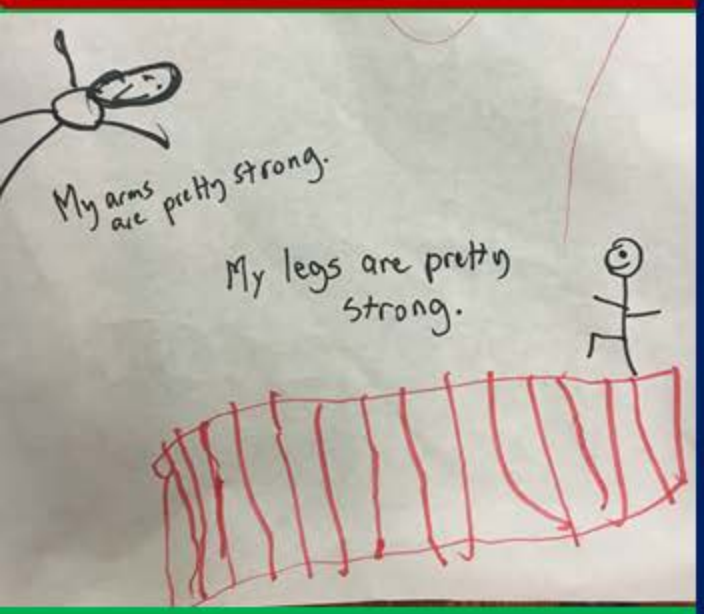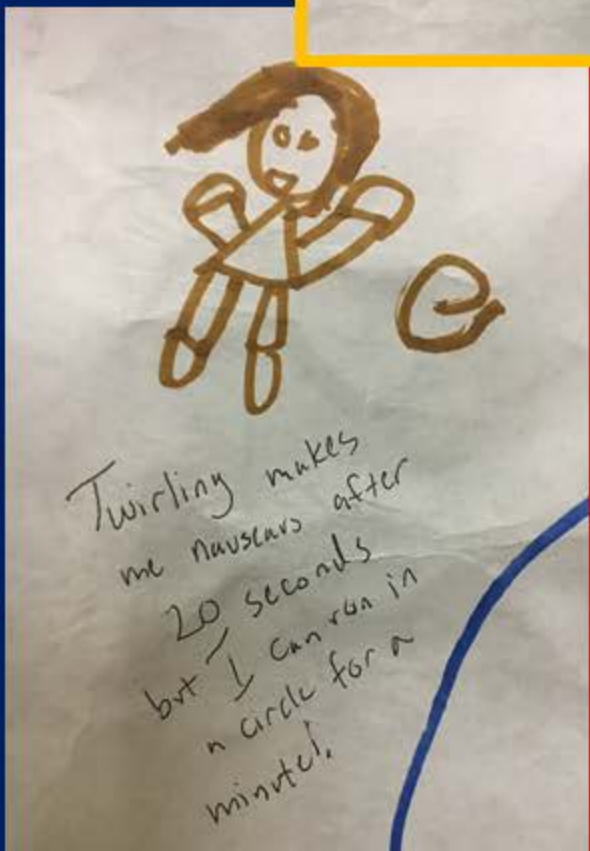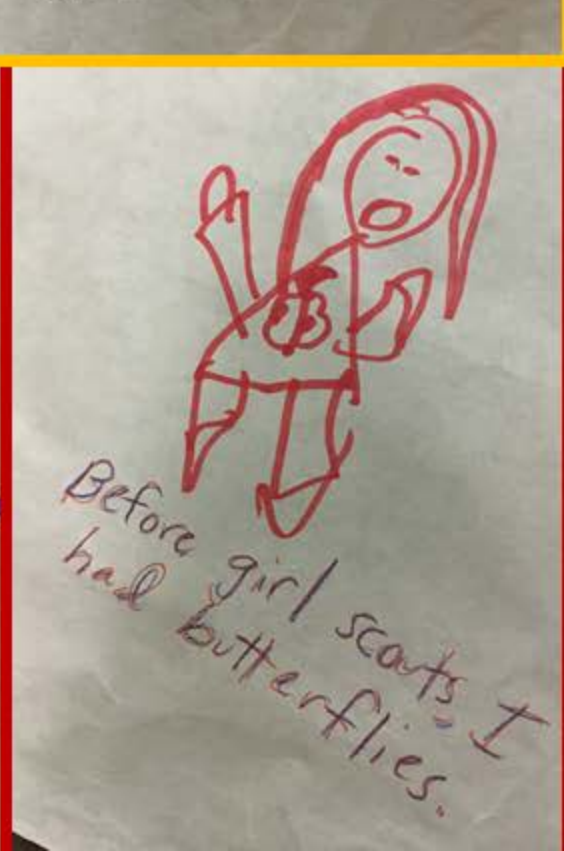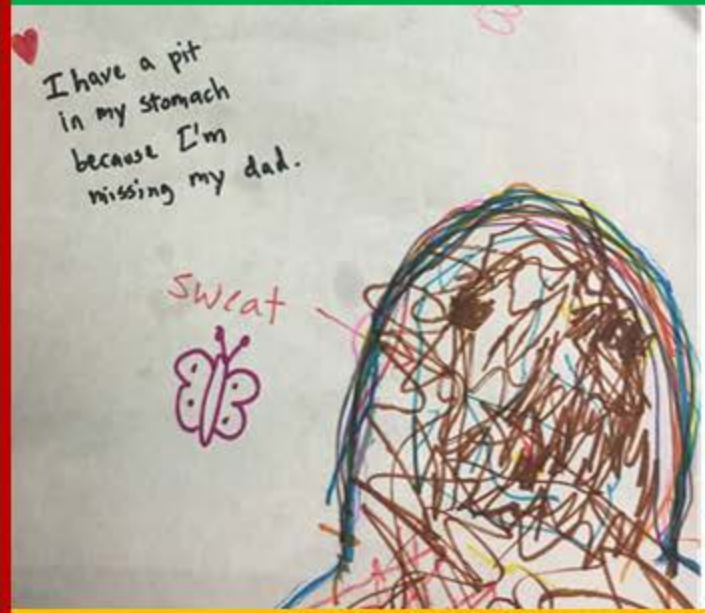

Supplemental Figure 1a

Supplement: NIHMS998851-supplement-Supp_figS1a.pdf [file NIHMS998851-supplement-Supp_figS1a.pdf]
